# Supplementary material for: Metabolic recovery from heavy exertion following banana compared to sugar beverage or water only ingestion: A randomized, crossover trial
Source: PubMed Central journal article supplement (PMC5864065; doi:10.1371/journal.pone.0194843), 2018-03-22
Supplement: pone.0194843.s001.pdf [file pone.0194843.s001.pdf]

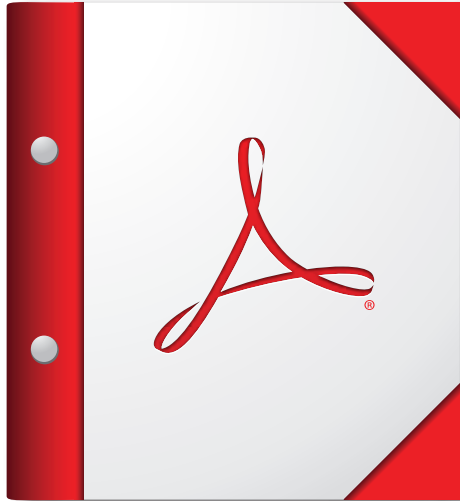

**For the best experience, open this PDF portfolio in  
Acrobat X or Adobe Reader X, or later.**

[Get Adobe Reader Now!](#)
